# Supplementary material for: A new thiacalix[4]arene-fluorescein based probe for detection of CN− and Cu2+ ions and construction of a sequential logic circuit
Source: Royal Society of Chemistry journal article supplement (doi:10.1039/c4dt01676a), 2014-01-01

## Electronic Supplementary Information

### A new thiacalix[4]arene-fluorescein based probe for detection of $\text{CN}^-$ and $\text{Cu}^{2+}$ ions and construction of a sequential logic circuit

Neetu Sharma, Shahi Imam Reja, Vandana Bhalla and Manoj Kumar\*

*Department of Chemistry, UGC-Centre for Advanced Studies-I, Guru Nanak Dev University,  
Amritsar-143005, Punjab, India*

*Email Address: [mksharmaa@yahoo.co.in](mailto:mksharmaa@yahoo.co.in)*

- S3** Instruments and quantum yield calculation
- S4** Synthetic routes
- S5**  $^1\text{H}$  NMR spectrum of compound **3** in  $\text{DMSO-d}_6$
- S6**  $^{13}\text{C}$  NMR spectra of compound **3** in  $\text{DMSO-d}_6$
- S7** Mass spectrum of compound **3**
- S8** UV-vis spectra of **3** in the presence of various cations in  $\text{CH}_3\text{CN}:\text{H}_2\text{O}$  (8:2, v/v) buffered with HEPES, pH = 7.0.
- S9** UV-vis spectra of **3** in the presence of  $\text{CN}^-$  and other anions in  $\text{CH}_3\text{CN}:\text{H}_2\text{O}$  (8:2, v/v) buffered with HEPES, pH = 7.0.
- S10** Fluorescence spectra of receptor **3** in the presence of different metal ions in  $\text{CH}_3\text{CN}:\text{H}_2\text{O}$  (8:2, v/v) buffered with HEPES, pH = 7.0.
- S11** Fluorescence spectra of **3** in the presence of  $\text{CN}^-$  and other various anions in  $\text{CH}_3\text{CN}:\text{H}_2\text{O}$  (8:2, v/v) buffered with HEPES, pH = 7.0.
- S12**  $^1\text{H}$  NMR titration of compound **3** with  $\text{CN}^-$  (TBACN) ( $\text{DMSO-d}_6$ , 500 MHz)
- S13**  $^{13}\text{C}$  NMR of compound **3** and **3a** (cyanide adduct) ( $\text{DMSO-d}_6$ , 500 MHz)

- S14** Mass spectra of Cyanide –Adduct (MALDI-TOF)
- S15** UV-vis spectra of adduct **3a** in presence of different metal ions in CH<sub>3</sub>CN:H<sub>2</sub>O (8:2, v/v) buffered with HEPES, pH = 7.0.
- S16** Fluorescence spectra of adduct **3a** in presence of different metal ions in CH<sub>3</sub>CN:H<sub>2</sub>O (8:2, v/v) buffered with HEPES, pH = 7.0.
- S17** Bar diagram showing selectivity/competitive selectivity of adduct **3a** towards Cu<sup>2+</sup> ions in CH<sub>3</sub>CN:H<sub>2</sub>O (8:2, v/v)
- S18** Mass analysis of Cyanide-adduct + Cu<sup>2+</sup> complex (MALDI-TOF)
- S19** SPECFIT data of **3a** adduct on Cu<sup>2+</sup> ions binding.
- S22** Bar diagram showing selectivity/competitive selectivity of receptor **3** towards CN<sup>-</sup> ions in CH<sub>3</sub>CN:H<sub>2</sub>O (8:2, v/v)
- S23** Detection limit of **3** for CN<sup>-</sup> ions at 528 nm.
- S24** UV-vis spectra of **3+CN<sup>-</sup>+Cu<sup>2+</sup>** in presence of CN<sup>-</sup> ions in CH<sub>3</sub>CN:H<sub>2</sub>O (8:2, v/v) buffered with HEPES, pH = 7.0.
- S25** Fluorescence spectra of **3+CN<sup>-</sup>+Cu<sup>2+</sup>** in the presence of CN<sup>-</sup> ions in CH<sub>3</sub>CN:H<sub>2</sub>O (8:2, v/v) buffered with HEPES, pH = 7.0.
- S26** Reversibility changes in absorbance spectra of receptor **3** on sequential addition of CN<sup>-</sup> and Cu<sup>2+</sup> in CH<sub>3</sub>CN:H<sub>2</sub>O (8:2, v/v) buffered with HEPES, pH = 7.0.
- S27** <sup>1</sup>H NMR spectrum of compound **2**
- S28** Mass spectrum of compound **2**

### General Experimental Procedure and quantum yield calculation:

All reagents were purchased from Aldrich and were used without further purification. Acetonitrile (AR grade) was used to perform analytical studies. UV-vis spectra were recorded on a SHIMADZU UV-2450 spectrophotometer, with a quartz cuvette (path length, 1 cm). The cell holder was thermostatted at 25 °C. The fluorescence spectra were recorded with a SHIMADZU 5301 PC spectrofluorimeter.  $^1\text{H}$  was recorded on a Bruker-AVANCE-II FT NMR-AL 500 MHz spectrophotometer using  $\text{CDCl}_3$ ,  $\text{DMSO-d}_6$  as solvent and tetramethylsilane  $\text{SiMe}_4$  as internal standards. Mass spectra were recorded on a Bruker MicroTof QII mass spectrometer and MALDI-TOF. UV-vis studies were performed in  $\text{CH}_3\text{CN}$  and HEPES buffer (pH = 7.0). Data are reported as follows: chemical shifts in ppm ( $\delta$ ), multiplicity (s = singlet, br = broad, d = doublet, t = triplet, m = multiplet), coupling constants  $J$  (Hz), integration, and interpretation. Silica gel 60 (60–120 mesh) was used for column chromatography. Fluorescence quantum yield<sup>1</sup> was determined by using optically matching solution of fluorescence ( $\Phi_{\text{fr}}$  = fluorescein) as standard at an excitation wavelength of 490 nm and quantum yield is calculated using the equation:

$$\Phi_{\text{fs}} = \Phi_{\text{fr}} \times \frac{1 - 10^{-A_{\text{r}}L_{\text{r}}}}{1 - 10^{-A_{\text{s}}L_{\text{s}}}} \times \frac{N_{\text{s}}^2}{N_{\text{r}}^2} \times \frac{D_{\text{s}}}{D_{\text{r}}}$$

$\Phi_{\text{fs}}$  and  $\Phi_{\text{fr}}$  are the radiative quantum yields of sample and the reference respectively,  $A_{\text{s}}$  and  $A_{\text{r}}$  are the absorbance of the sample and the reference respectively,  $D_{\text{s}}$  and  $D_{\text{r}}$  the respective areas of emission for sample and reference.  $L_{\text{s}}$  and  $L_{\text{r}}$  are the lengths of the absorption cells of sample and reference respectively.  $N_{\text{s}}$  and  $N_{\text{r}}$  are the refractive indices of the sample and reference solutions.

1 (a) Deams, J. N.; Grosby, G. A. *J. Phys. Chem.*, 1971, **75**, 991; (b) D. Magde, R. Wong and P. G. Seybold, *Photochem. Photobiol.*, 2002, **75**, 327–334.

## Synthetic routes

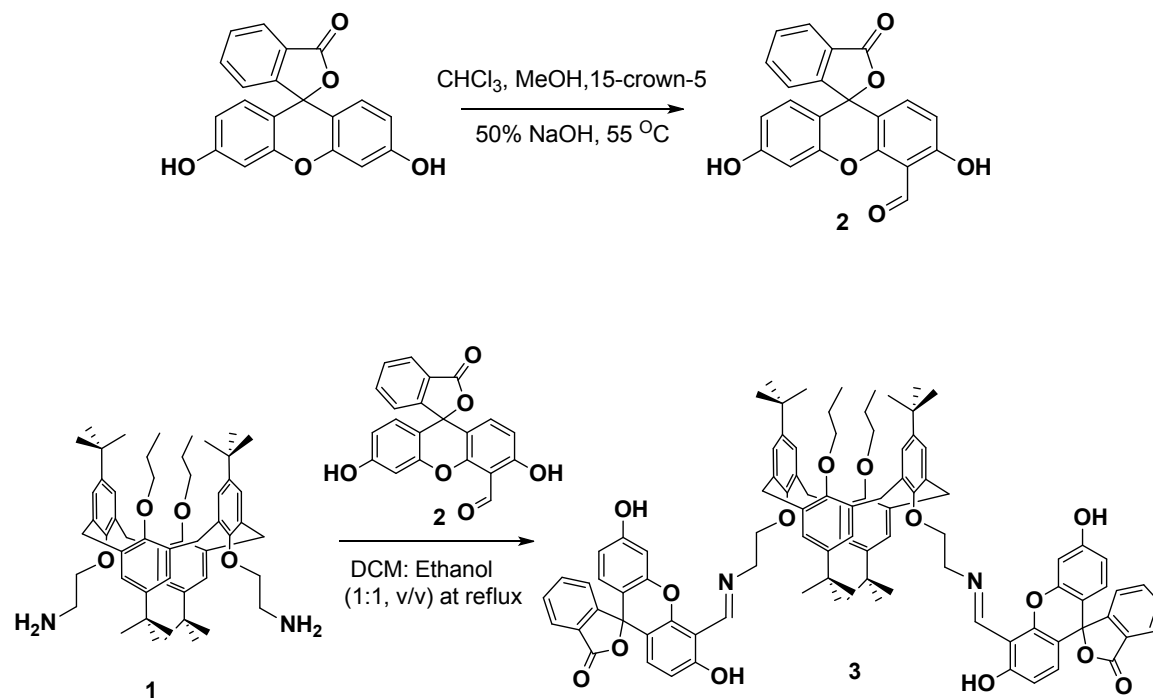

Synthetic Scheme

# <sup>1</sup>H NMR spectra of Compound **3** (DMSO-d<sub>6</sub>, 500 MHz)

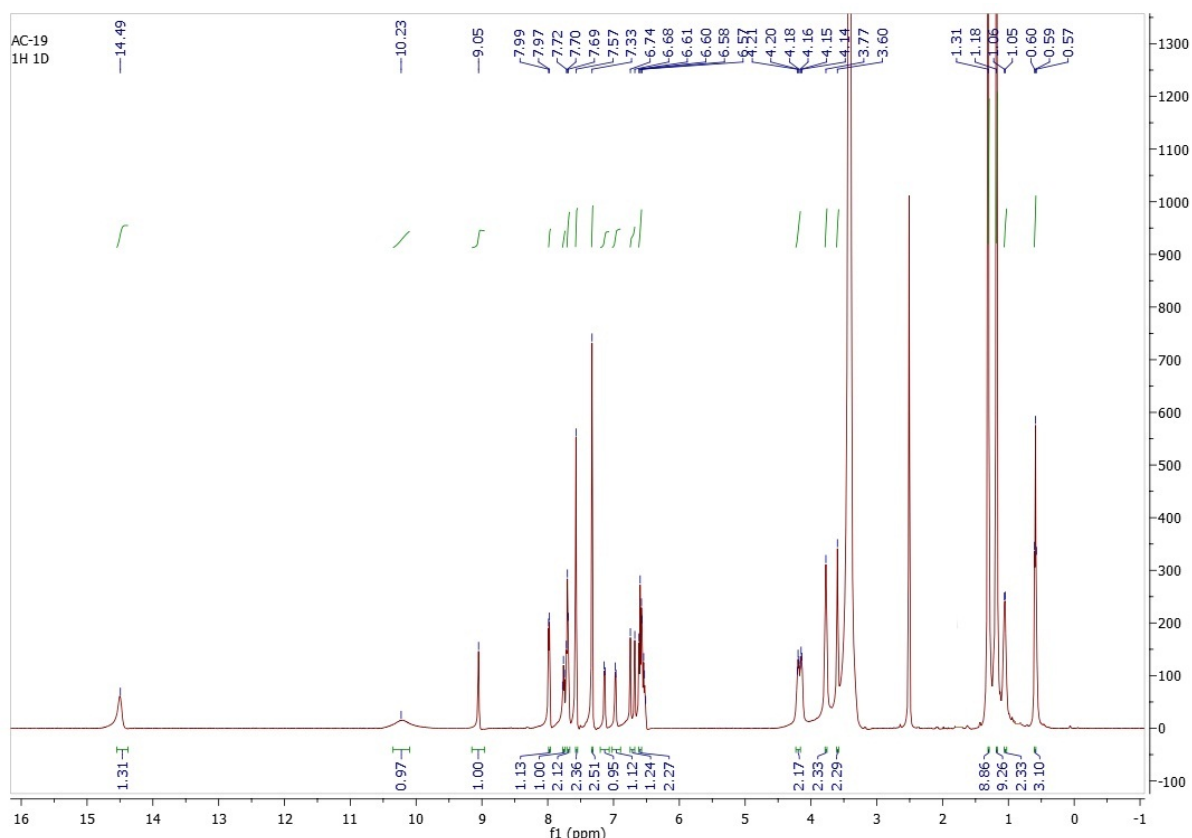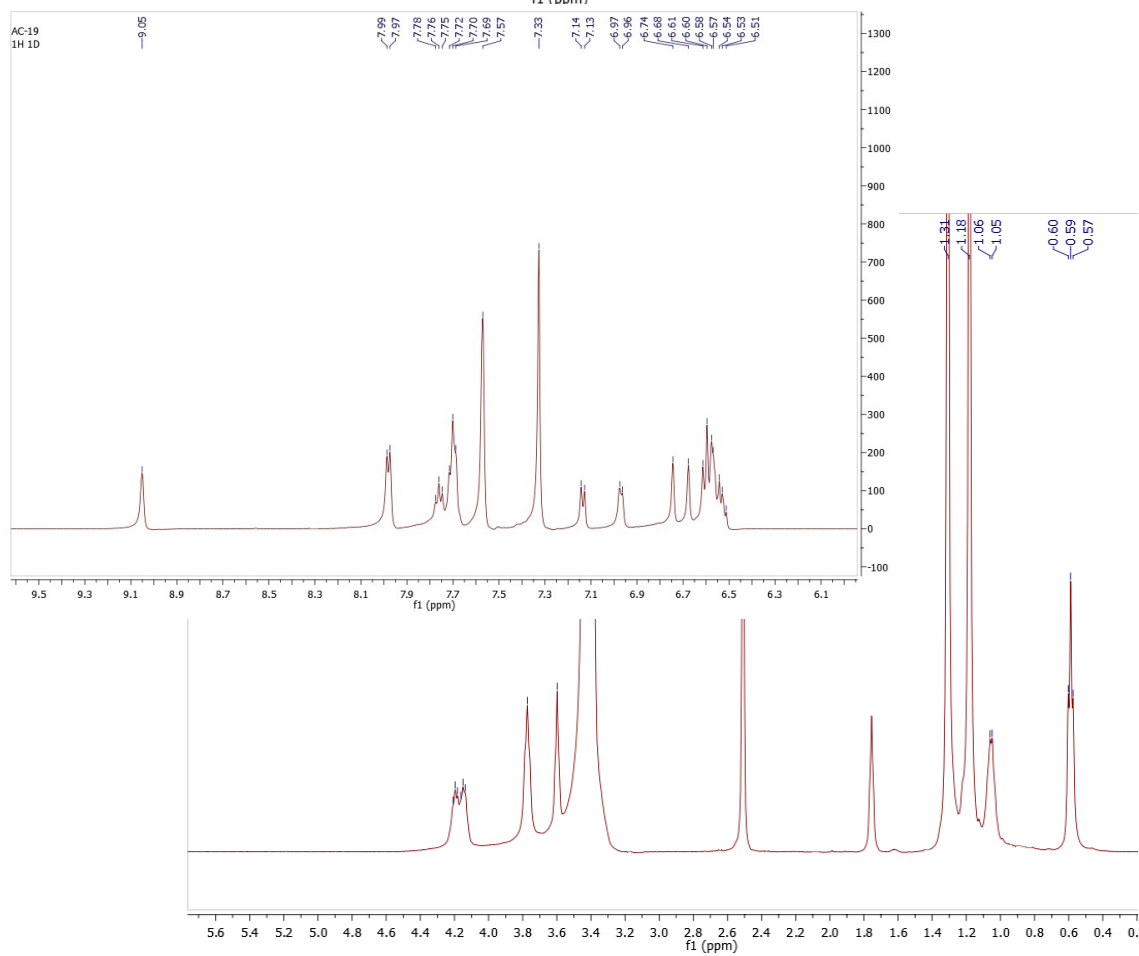

$^{13}\text{C}$  NMR spectra of Compound **3** (DMSO- $\text{d}_6$ , 500 MHz)

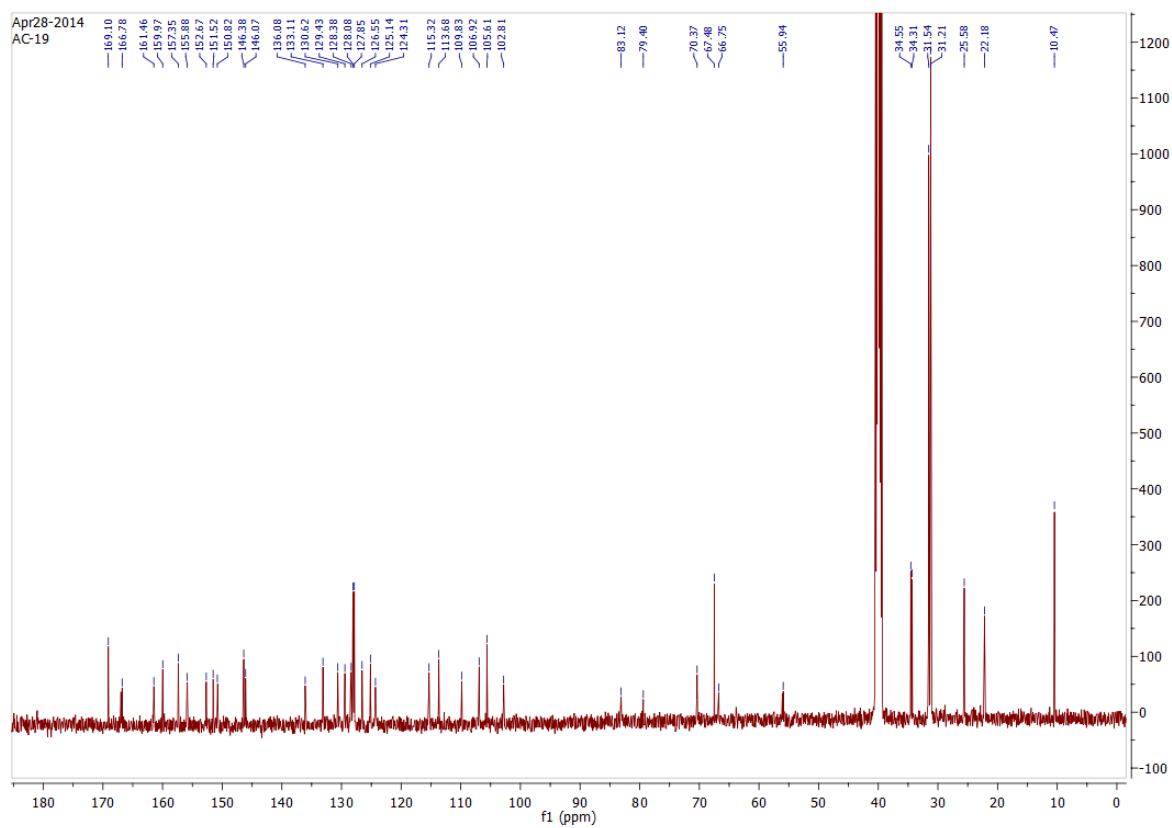

### Mass spectra of Compound **3** (MALDI-TOF)

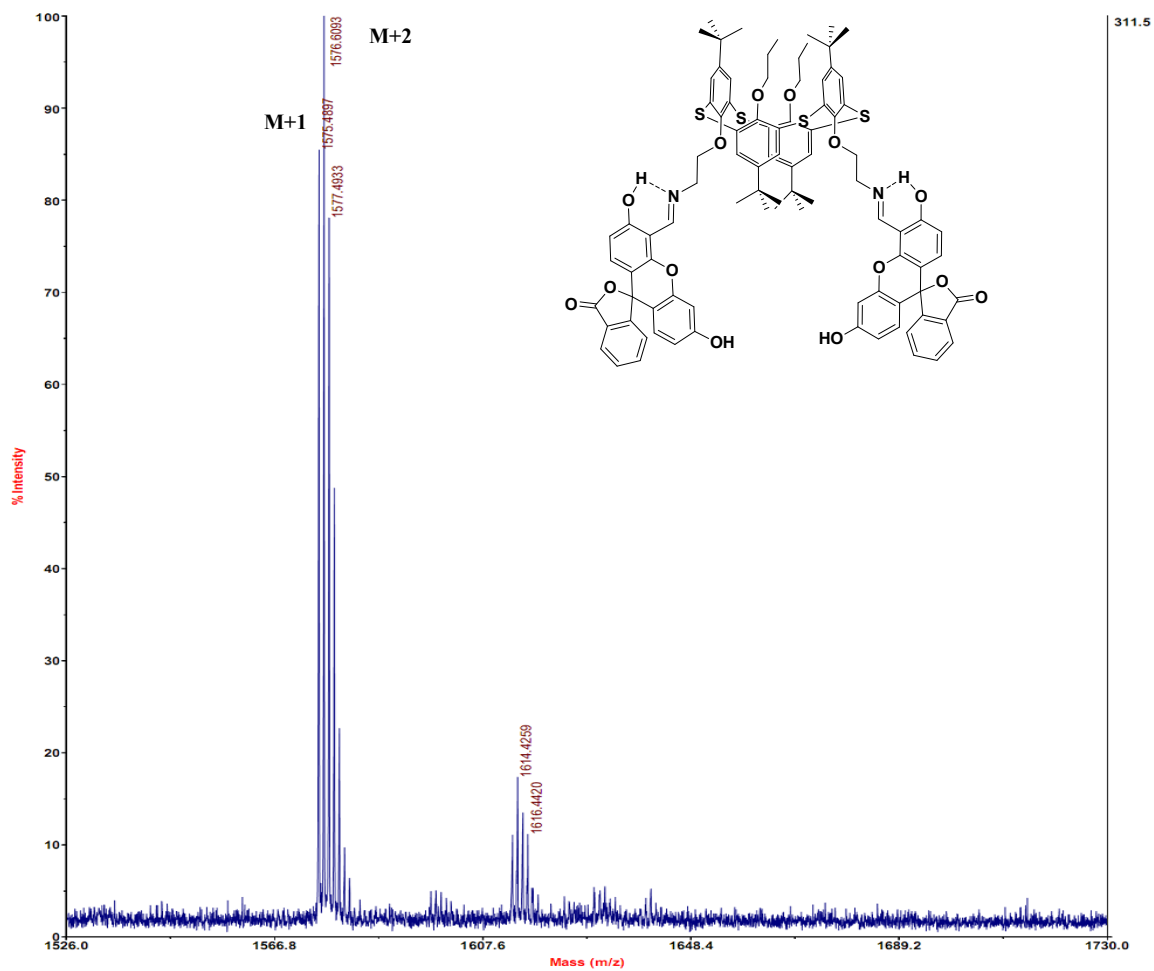

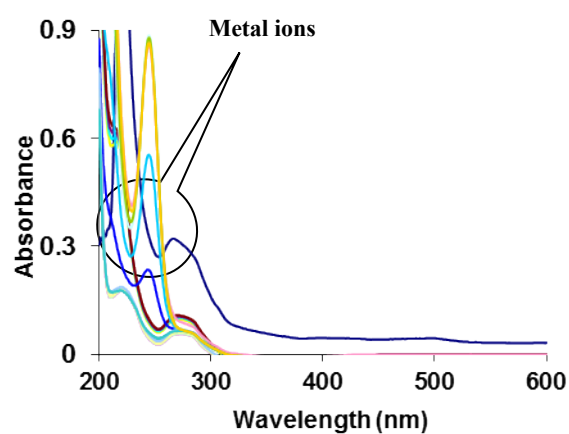

**Figure 1.** Absorption spectra of probe **3** (5.0  $\mu\text{M}$ ) upon addition of various cations:  $\text{Cu}^{2+}$ ,  $\text{Ag}^{+}$ ,  $\text{Co}^{2+}$ ,  $\text{Ni}^{2+}$ ,  $\text{Zn}^{2+}$ ,  $\text{Cd}^{2+}$ ,  $\text{Hg}^{2+}$ ,  $\text{Na}^{+}$ ,  $\text{K}^{+}$ ,  $\text{Li}^{+}$ ,  $\text{Mg}^{2+}$ ,  $\text{Be}^{2+}$ ,  $\text{Ca}^{2+}$  (100 equiv) in  $\text{CH}_3\text{CN}/\text{H}_2\text{O}$  (8:2, v/v) buffered with HEPES, pH = 7.0.

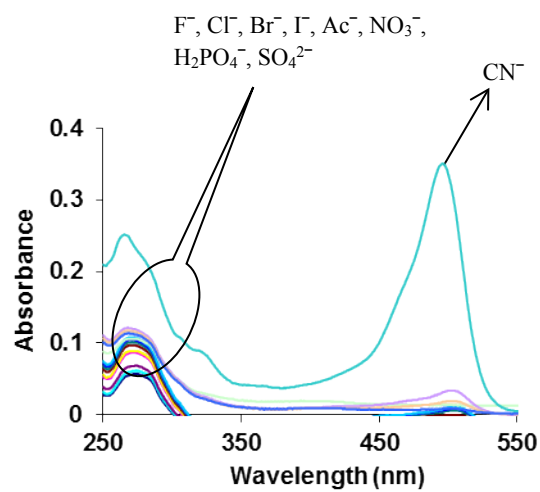

**Figure 2.** Absorption spectra of probe **3** (5.0  $\mu$ M) upon addition of various different anions:  $F^-$ ,  $Cl^-$ ,  $Br^-$ ,  $I^-$ ,  $Ac^-$ ,  $NO_3^-$ ,  $H_2PO_4^-$ ,  $SO_4^{2-}$ ,  $CN^-$  (0-25 equiv) in  $CH_3CN/H_2O$  (8:2, v/v) buffered with HEPES, pH = 7.0.

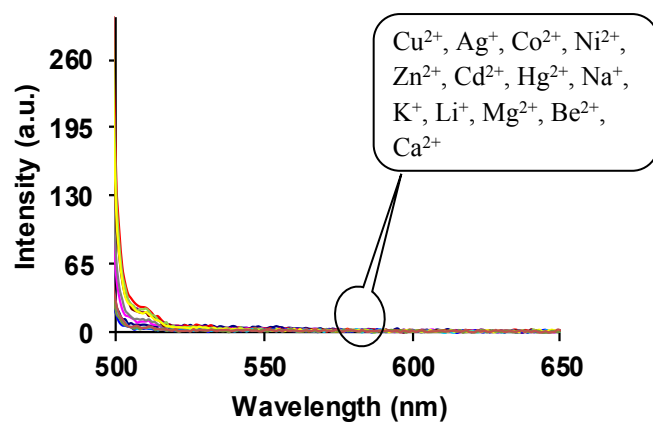

**Figure 3.** Fluorescence spectra of **3** (5.0  $\mu\text{M}$ ) upon addition of metal ions:  $\text{Cu}^{2+}$ ,  $\text{Ag}^+$ ,  $\text{Co}^{2+}$ ,  $\text{Ni}^{2+}$ ,  $\text{Zn}^{2+}$ ,  $\text{Cd}^{2+}$ ,  $\text{Hg}^{2+}$ ,  $\text{Na}^+$ ,  $\text{K}^+$ ,  $\text{Li}^+$ ,  $\text{Mg}^{2+}$ ,  $\text{Be}^{2+}$ ,  $\text{Ca}^{2+}$  (100 equiv) in  $\text{CH}_3\text{CN}/\text{H}_2\text{O}$  (8:2, v/v) buffered with HEPES, pH = 7.0;  $\lambda_{\text{ex}}$  = 490 nm.

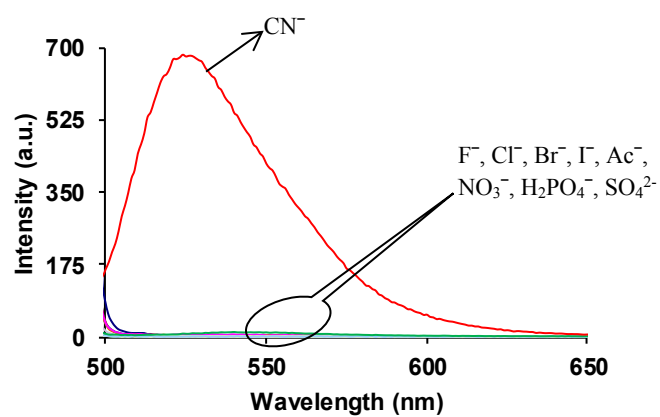

**Figure 4.** Fluorescence spectra of **3** (5.0  $\mu\text{M}$ ) upon addition of (0-25 equiv) of various different anions:  $\text{F}^-$ ,  $\text{Cl}^-$ ,  $\text{Br}^-$ ,  $\text{I}^-$ ,  $\text{Ac}^-$ ,  $\text{NO}_3^-$ ,  $\text{H}_2\text{PO}_4^-$ ,  $\text{CN}^-$ ,  $\text{SO}_4^{2-}$  in  $\text{CH}_3\text{CN}/\text{H}_2\text{O}$  (8:2, v/v) buffered with HEPES,  $\text{pH} = 7.0$ ;  $\lambda_{\text{ex}} = 490 \text{ nm}$ .

$^1\text{H}$  NMR titration of compound **3** with  $\text{CN}^-$  (TBACN) ( $\text{DMSO-d}_6$ , 500 MHz)

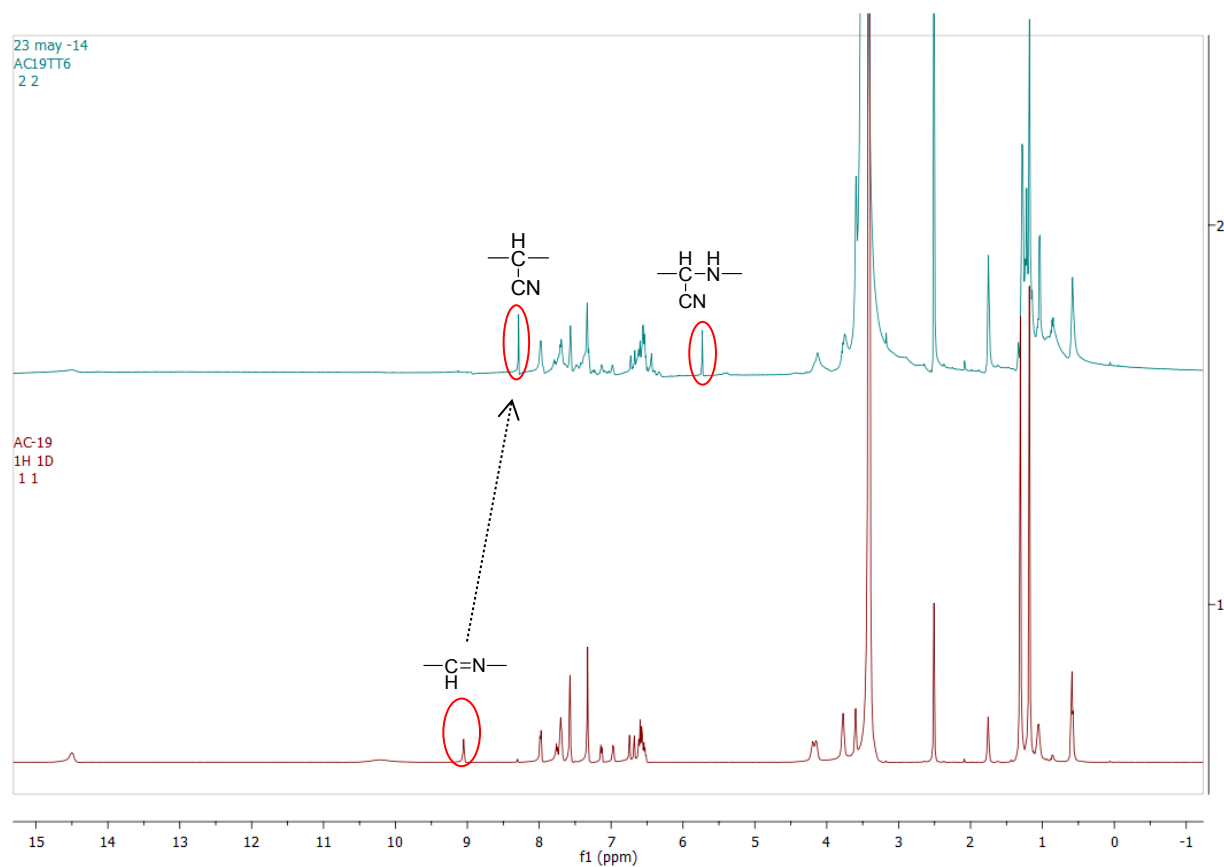

$^{13}\text{C}$  NMR of compound **3** and **3a** (cyanide adduct) (DMSO- $\text{d}_6$ , 500 MHz)

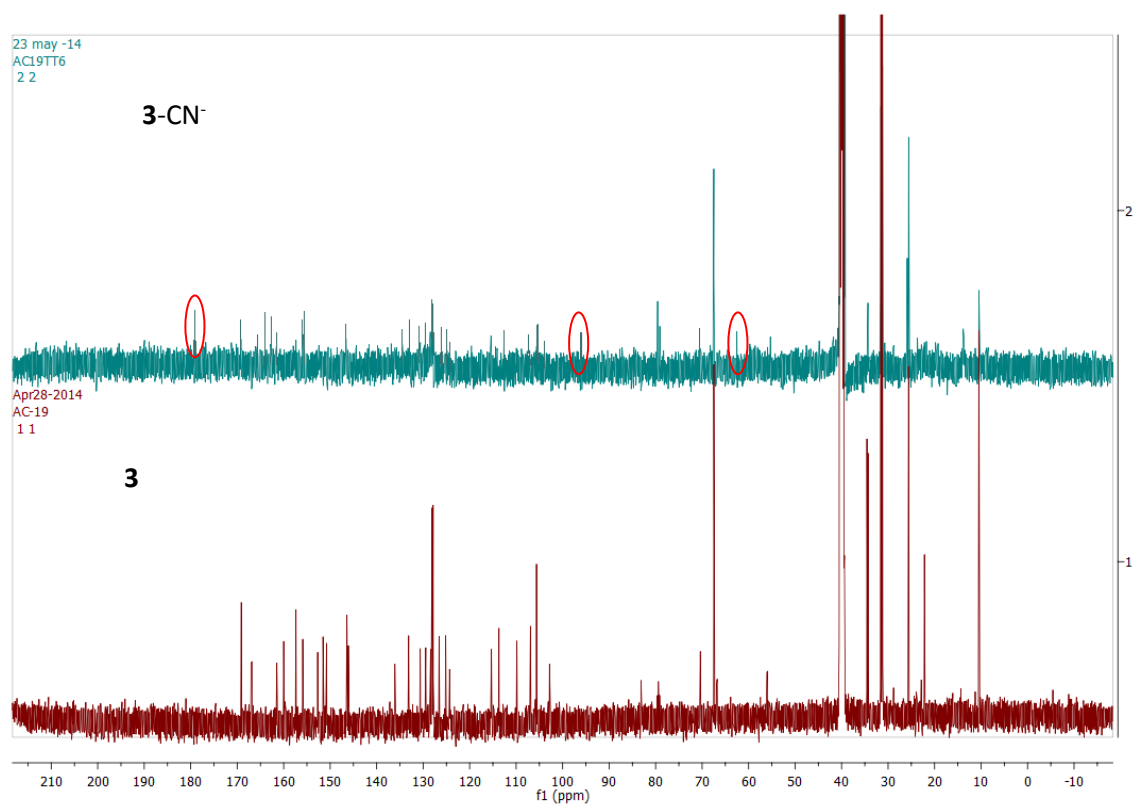

## Mass spectra of Cyanide –Adduct (MALDI-TOF)

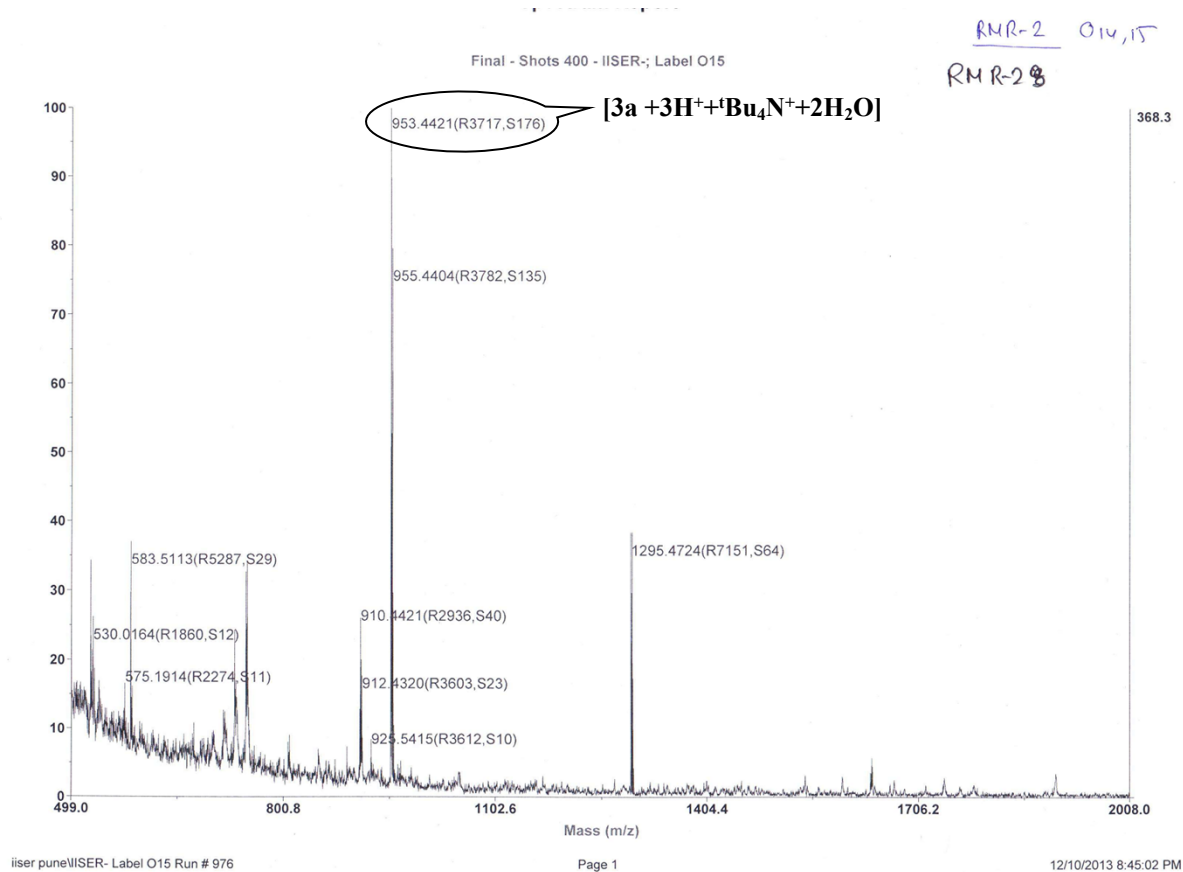

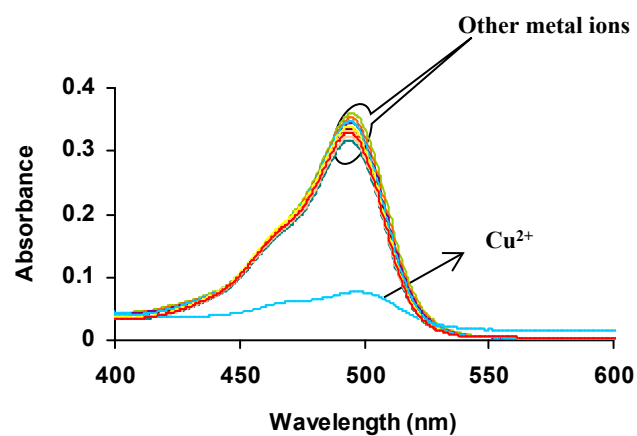

**Figure 5.** Absorption spectra of adduct **3a** upon addition of various different metal ions:  $\text{Cu}^{2+}$ ,  $\text{Ag}^+$ ,  $\text{Co}^{2+}$ ,  $\text{Ni}^{2+}$ ,  $\text{Zn}^{2+}$ ,  $\text{Cd}^{2+}$ ,  $\text{Hg}^{2+}$ ,  $\text{Na}^+$ ,  $\text{K}^+$ ,  $\text{Li}^+$ ,  $\text{Mg}^{2+}$ ,  $\text{Be}^{2+}$ ,  $\text{Ca}^{2+}$  (0-44 equiv) in  $\text{CH}_3\text{CN}/\text{H}_2\text{O}$  (8:2, v/v) buffered with HEPES, pH = 7.0.

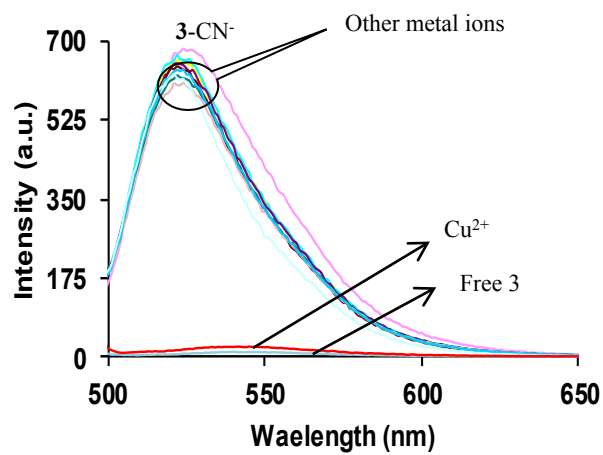

**Figure 6.** Fluorescence spectra of adduct **3a** (5.0  $\mu\text{M}$ ) in response to the addition of different metal ions ( $\text{Cu}^{2+}$ ,  $\text{Ag}^{+}$ ,  $\text{Co}^{2+}$ ,  $\text{Ni}^{2+}$ ,  $\text{Zn}^{2+}$ ,  $\text{Cd}^{2+}$ ,  $\text{Hg}^{2+}$ ,  $\text{Na}^{+}$ ,  $\text{K}^{+}$ ,  $\text{Li}^{+}$ ,  $\text{Mg}^{2+}$ ,  $\text{Be}^{2+}$ ,  $\text{Ca}^{2+}$ ) (44 equiv each) in  $\text{CH}_3\text{CN}/\text{H}_2\text{O}$  (8:2, v/v);  $\lambda_{\text{ex}} = 490 \text{ nm}$ .

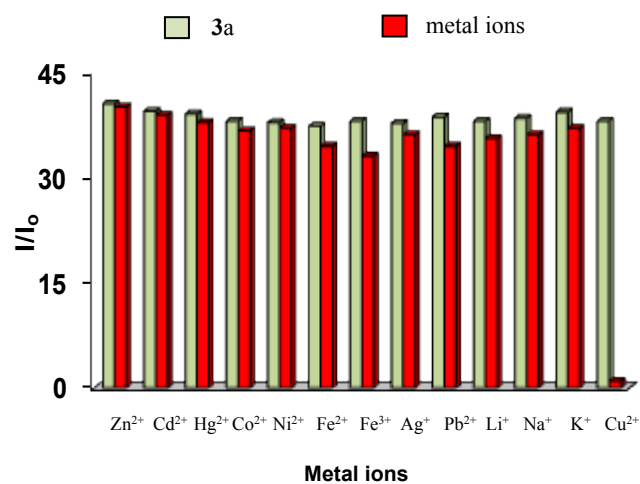

**Figure 7.** Fluorescence response of adduct **3a** towards various metal ions (44 equiv) in CH<sub>3</sub>CN/H<sub>2</sub>O (8:2, v/v);  $\lambda_{\text{ex}}$  = 490 nm. Bars represent the emission intensity ratio ( $I/I_0$ ) ( $I_0$  = initial fluorescence intensity at 528 nm;  $I$  = final fluorescence intensity at 528 nm after the addition of metal ions).

# Mass analysis of Cyanide-adduct + Cu<sup>2+</sup> complex (MALDI-TOF)

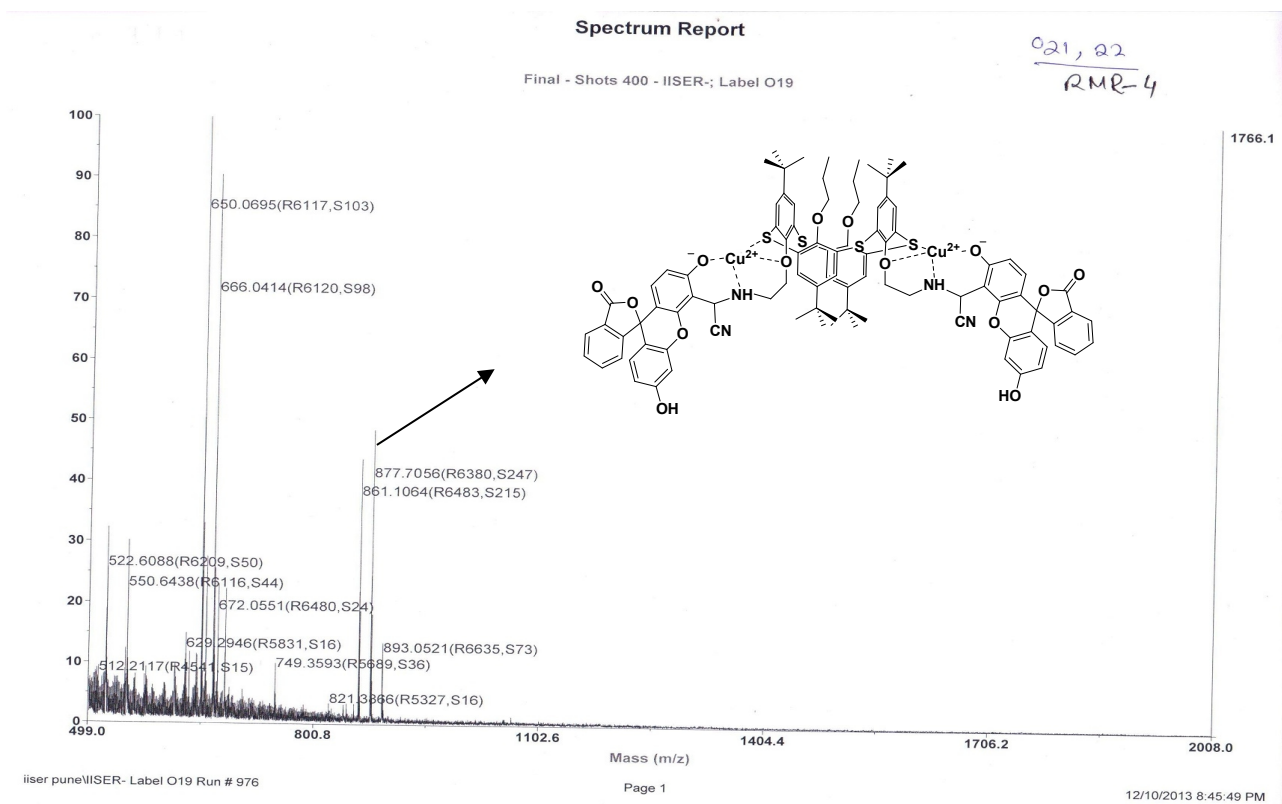

## SPECFIT data of Cu<sup>2+</sup> binding with 3a adduct

### [PROGRAM]

Name = SPECFIT

Version = 3.0

### [FILE]

Name = 20% WATER -ACN.FAC

Path = C:\Program Files\SPECFIT\DATA\

Date = 24-Oct-07

Time = 2:30:12 AM

Ncomp = 2

Nmeas = 44

Nwave = 321

### [FACTOR ANALYSIS]

Tolerance = 1.000E-09

Max.Factors = 10

Num.Factors = 6

Significant = 3

Eigen Noise = 9.388E-01

Exp't Noise = 9.388E-01

| # | Eigenvalue | Square Sum | Residual  | Prediction     |
|---|------------|------------|-----------|----------------|
| 1 | 9.238E+07  | 1.565E+05  | 3.329E+00 | Data Vector    |
| 2 | 1.343E+05  | 2.225E+04  | 1.255E+00 | Data Vector    |
| 3 | 9.807E+03  | 1.245E+04  | 9.388E-01 | Data Vector    |
| 4 | 2.675E+03  | 9.770E+03  | 8.318E-01 | Probably Noise |

5 1.469E+03 8.302E+03 7.668E-01 Probably Noise

6 5.998E+02 7.702E+03 7.386E-01 Probably Noise

[MODEL]

Date = 24-Aug-07

Time = 2:51:04 AM

Model = 0

Index = 3

Function = 1

Species = 3

Params = 3

| [SPECIES] | [COLORED] | [FIXED] | [SPECTRUM] |
|-----------|-----------|---------|------------|
|-----------|-----------|---------|------------|

|       |       |       |
|-------|-------|-------|
| 1 0 0 | False | False |
|-------|-------|-------|

|       |      |       |
|-------|------|-------|
| 0 1 0 | True | False |
|-------|------|-------|

|       |      |       |
|-------|------|-------|
| 2 1 0 | True | False |
|-------|------|-------|

| [SPECIES] | [FIXED] | [PARAMETER] | [ERROR] |
|-----------|---------|-------------|---------|
|-----------|---------|-------------|---------|

|       |      |                 |             |
|-------|------|-----------------|-------------|
| 1 0 0 | True | 0.00000E+00 +/- | 0.00000E+00 |
|-------|------|-----------------|-------------|

|       |      |                 |             |
|-------|------|-----------------|-------------|
| 0 1 0 | True | 0.00000E+00 +/- | 0.00000E+00 |
|-------|------|-----------------|-------------|

|       |       |                 |             |
|-------|-------|-----------------|-------------|
| 2 1 0 | False | 9.58070E+00 +/- | 5.03060E-02 |
|-------|-------|-----------------|-------------|

[CONVERGENCE]

Iterations = 7

Convergence Limit = 1.000E-04

Convergence Found = 1.170E-05

Marquardt Parameter = 0.0

Sum(Y-y)^2 Residuals = 9.08231E+05

Std. Deviation of Fit(Y) = 8.01927E+00

[STATISTICS]

Experimental Noise = 9.388E-01

Relative Error Of Fit = 9.9564%

Durbin-Watson Factor = 0.3837

Goodness Of Fit, Chi^2 = 7.297E+01

Durbin-Watson Factor (raw data) = None

Goodness Of Fit, Chi^2 (raw data) = None

[COVARIANCE]

6.756E-03

[CORRELATION]

1.000E+00

[END FILE]

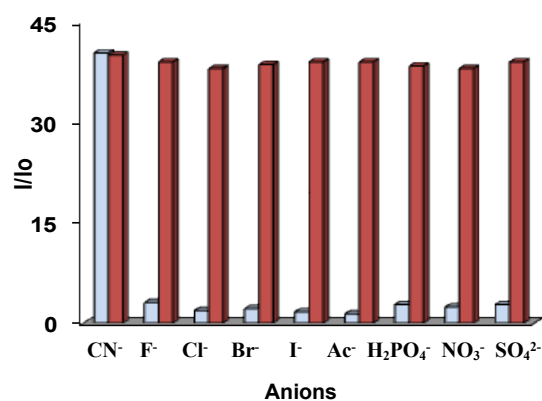

**Figure 8.** Fluorescence response of **3** (5.0  $\mu$ M) to various anions (25 equiv) in CH<sub>3</sub>CN/H<sub>2</sub>O (8:2, v/v);  $\lambda_{\text{ex}}$  = 490 nm. Bars represent the emission intensity ratio ( $I/I_0$ ) ( $I_0$  = initial fluorescence intensity at 528 nm;  $I$  = final fluorescence intensity at 528 nm after the addition of anions). Blue bars represent selectivity ( $I/I_0$ ) of **3** upon addition of different anions; red bars represent competitive selectivity of probe **3** towards CN<sup>-</sup> ions (25 equiv) in the presence of other anions (25 equiv).

### Calculations for detection limit:

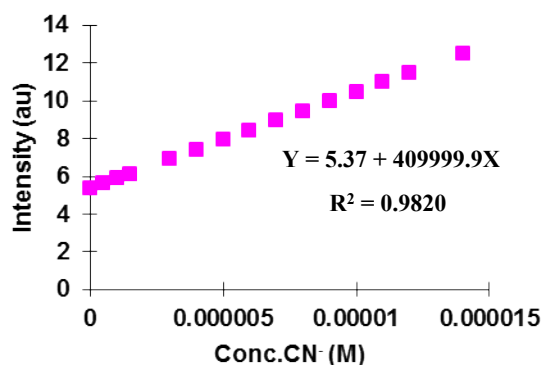

**Figure 9.** Figure showing the fluorescence intensity at 528 nm as a function of CN<sup>-</sup> ions concentration (M).

The detection limit was calculated based on the fluorescence titration. To determine the S/N ratio, the emission intensity of receptor **3** without CN<sup>-</sup> was measured by 10 times and the standard deviation of blank measurements was determined. The detection limit is then calculated with the following equation:

$$DL = 3 \times SD/S$$

Where SD is the standard deviation of the blank solution measured by 10 times; S is the slope of the calibration curve.

From the graph we get slope (S) = 409999.9, and SD value is 0.02612

Thus using the formula we get the Detection Limit (DL) =  $1.911 \times 10^{-7}$  M i.e. probe **3** can detect CN<sup>-</sup> in this minimum concentration through fluorescence method.

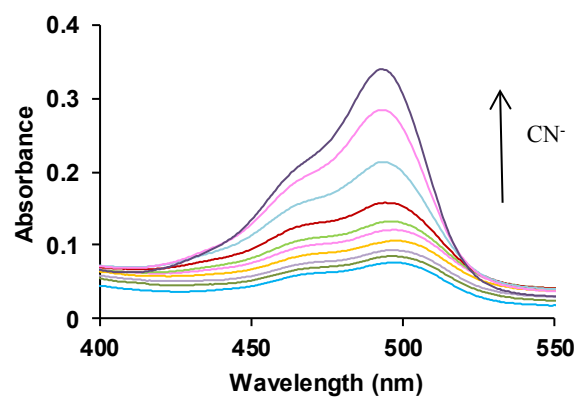

**Figure 10.** Absorption spectra of **3-CN-Cu<sup>2+</sup>** upon the addition of CN<sup>-</sup> ions (0-30 equiv) in CH<sub>3</sub>CN/H<sub>2</sub>O (8:2, v/v) buffered with HEPES, pH = 7.0.

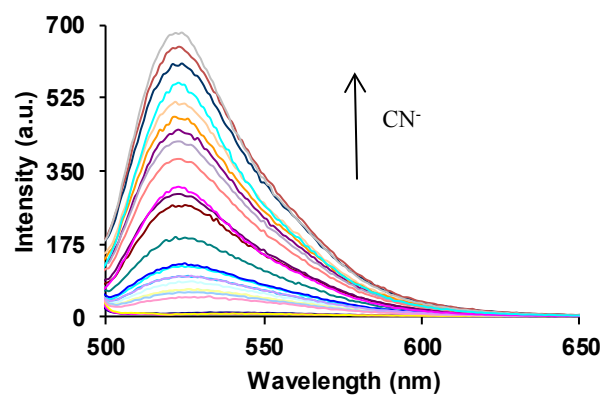

**Figure 11.** Fluorescence spectra of **3-CN-Cu<sup>2+</sup>** upon the addition of  $\text{CN}^-$  anions (0-30 equiv) in  $\text{CH}_3\text{CN}/\text{H}_2\text{O}$  (8:2, v/v) buffered with HEPES, pH = 7.0;  $\lambda_{\text{ex}}$  = 490 nm.

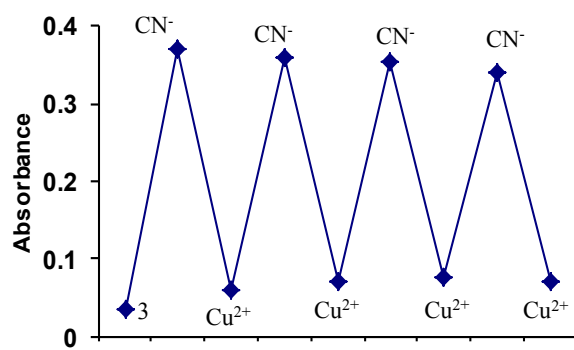

**Figure 12.** Reversibility changes in absorbance spectrum of compound **3** upon the sequential addition of  $\text{CN}^-$  and  $\text{Cu}^{2+}$  ions.

**$^1\text{H}$  NMR (DMSO- $d_6$ , 400 MHz, ppm) of compound 2:**

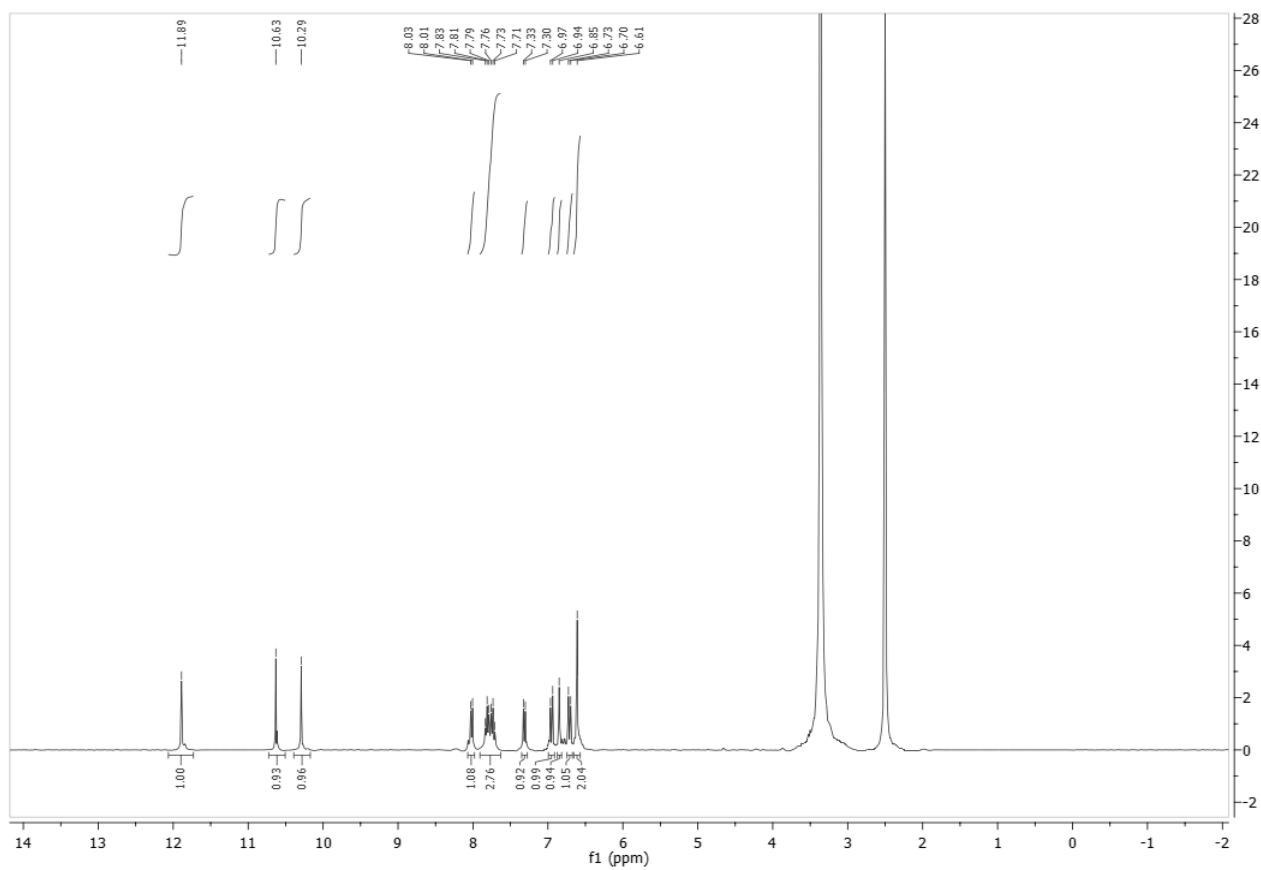

**Mass spectrum of compound 2:**

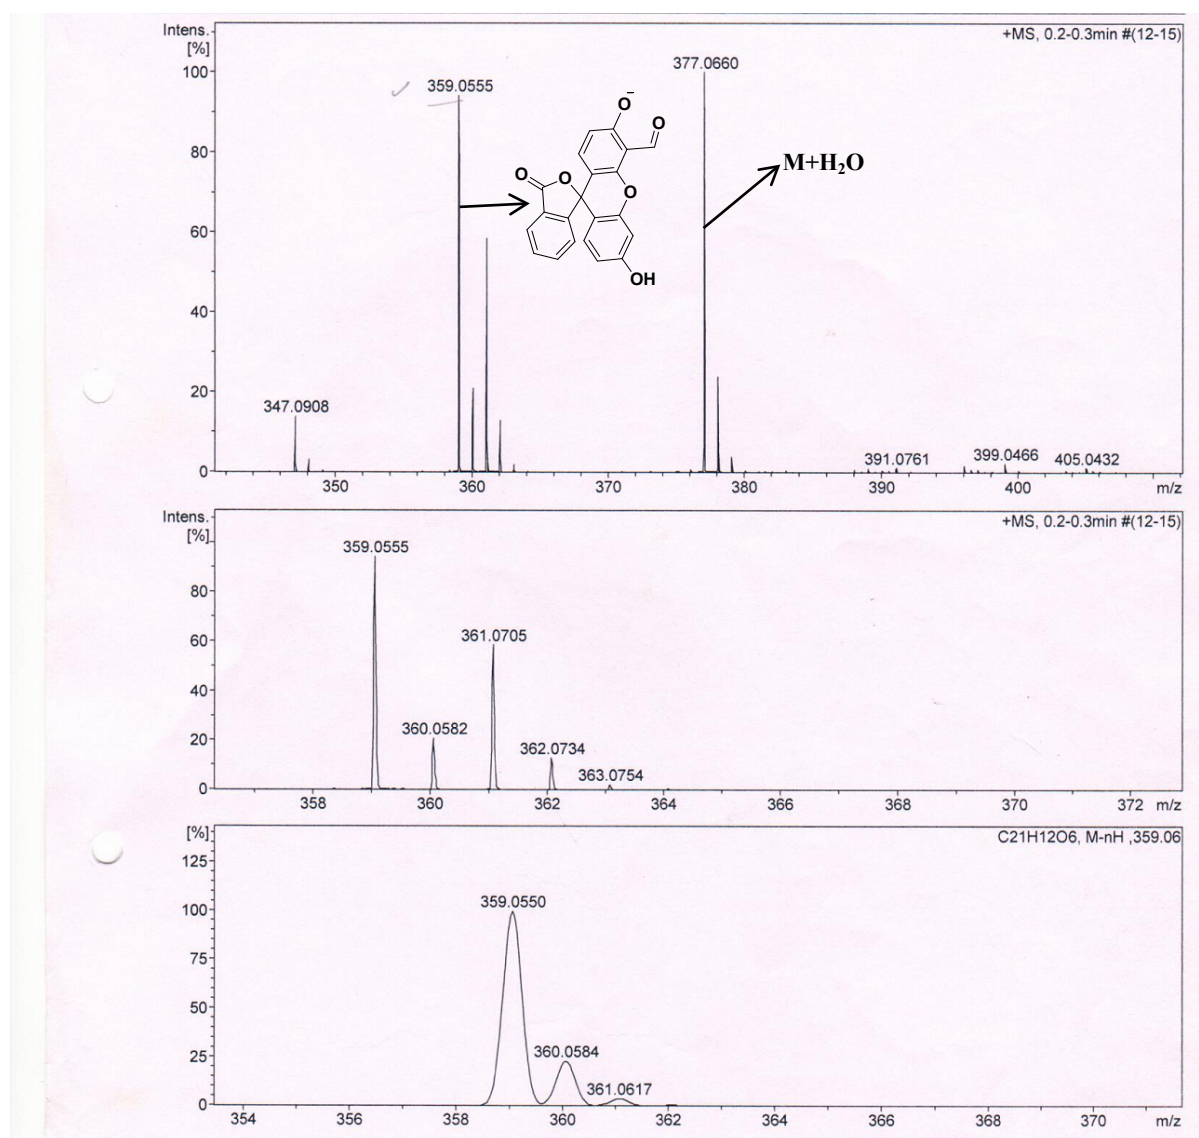

Supplement: c4dt01676a1.pdf [file c4dt01676a1.pdf]
